# Supplementary material
Source: Springer Nature journal article supplement (https://www.springermedizin.de/resource/supplementary/12888_2013_1428_MOESM5_ESM.pdf/9480192)

SKAMP-Combined

score

2.0  
1.6  
1.2  
0.8  
0.4  
0.0

1

1.5

3

4.5

Time (hours)

- Ritalin LA<sup>®</sup>
- ▲ Medikinet<sup>®</sup> retard
- ◆ Placebo
- Clinical relevance

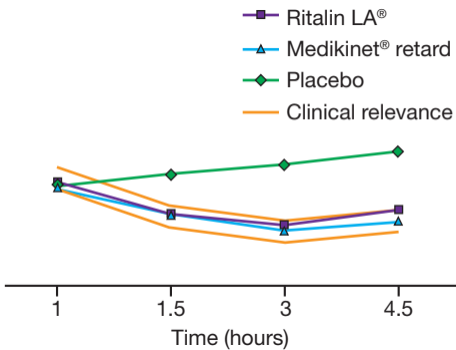

Supplement: MOESM5 [file 9480192]
